# Supplementary material
Source: Springer Nature journal article supplement (https://www.springermedizin.de/resource/supplementary/13058_2006_1722_MOESM5_ESM.pdf/9699774)

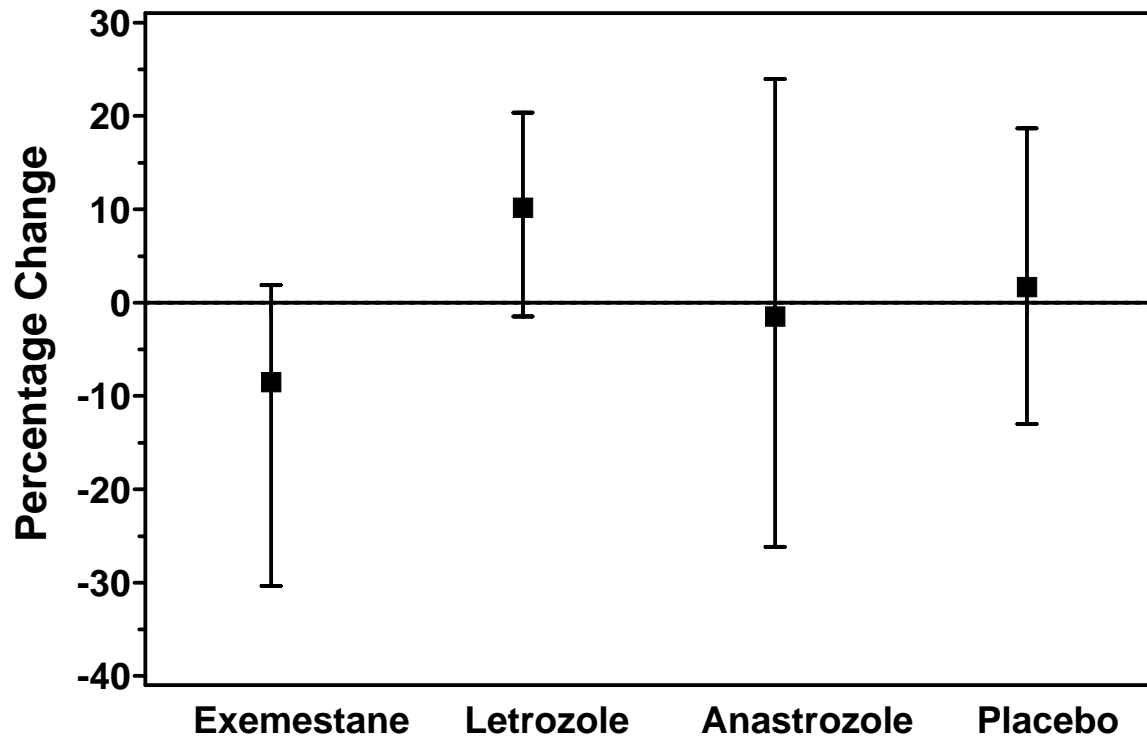

Supplement: MOESM5 [file 9699774]
